## 14 **Abstract**

15           The discovery of non-chromosomal circular DNA offers new directions in linking  
16 genome structure with function in plant biology. Glyphosate resistance through *EPSPS*  
17 gene copy amplification in Palmer amaranth was due to an autonomously replicating  
18 extra-chromosomal circular DNA mechanism (eccDNA). CIDER-Seq analysis of  
19 geographically distant glyphosate sensitive (GS) and resistant (GR) Palmer Amaranth  
20 (*Amaranthus palmeri*) revealed the presence of numerous small extra-chromosomal  
21 circular DNAs varying in size and with degrees of repetitive content, coding sequence,  
22 and motifs associated with autonomous replication. In GS biotypes, only a small portion  
23 of these aligned to the 399 kb eccDNA replicon, the vehicle underlying gene  
24 amplification and genetic resistance to the herbicide glyphosate. The aligned eccDNAs  
25 from GS were separated from one another by large gaps in sequence. In GR biotypes,  
26 the eccDNAs were present in both abundance and diversity to assemble into a nearly  
27 complete eccDNA replicon. Mean sizes of eccDNAs were similar in both biotypes and  
28 were around 5kb with larger eccDNAs near 25kb. Gene content for eccDNAs ranged  
29 from 0 to 3 with functions that include ribosomal proteins, transport, metabolism, and  
30 general stress response genetic elements. Repeat content among smaller eccDNAs  
31 indicate a potential for recombination into larger structures. Genomic hotspots were also  
32 identified in the Palmer amaranth genome with a disposition for gene focal  
33 amplifications as eccDNA. The presence of eccDNA may serve as a reservoir of genetic  
34 heterogeneity in this species and may be functionally important for survival.

35

## 36 Introduction

37           Extra-chromosomal circular DNA (eccDNA) are nucleus limited ring-like DNA  
38 entities derived from the genome and have been found in a wide range of eukaryotic  
39 organisms including yeast, *Drosophila*, *Xenopus*, mice, and humans [1-4]. In yeast,  
40 eccDNAs with functional genes and sizes of up to 38 kb that cover 23% of the genome  
41 have been reported [5]. EccDNAs have been reported in normal healthy cells in  
42 humans [6, 7] with functions associated with aging and the formation of telomeric circles  
43 [8, 9], cancer progression, and therapeutic resistance [10-12]. EccDNAs have been  
44 implicated in approximately half of all human cancers contributing to genetic  
45 heterogeneity that enables aggressive tumors with a selective advantage; hence the  
46 higher prevalence in malignant tumors [13-15]. Sizes of cancer related eccDNA have  
47 been reported to range from several hundred base pairs to 600 kb encoded with  
48 functional oncogenes and their various regulatory elements [16, 17]. In plants,  
49 eccDNAs have been reported in *Arabidopsis* [18, 19], *Oryza*, *Pisum*, *Secale*, *Triticum*,  
50 and *Vicia* [20, 21] with sizes that range from 1 kb to 50kb. These eccDNAs contain  
51 coding sequences commonly found within the nucleus such as ribosomal genes, tRNAs,  
52 and transposons [19, 22, 23]. EccDNAs are thought to arise from linear chromosomes  
53 through repeat-mediated intrachromosomal homologous recombination that results in  
54 the 'looping-out' of circular structures. These focal amplifications are mediated by  
55 multimers corresponding to 5S ribosomal DNA, non-coding chromosomal high-copy  
56 tandem repeats, and telomeric DNA [1, 21, 22]. In *Arabidopsis*, eccDNA genesis is the  
57 result of recombination among inverted repeats upstream and downstream of the  
58 various tRNAs and transposons [19]. Several follow up studies using *Arabidopsis* and

59 rice, have shown that defective RNA polymerase II (Pol II) activity and simultaneous  
60 inhibition of DNA methylation leads to the activation of retrotransposons which can  
61 induce eccDNA formation upon stress [11]. These studies suggest a possible  
62 relationship among epigenetic status, regulation of transposon bursts, and genomic  
63 focal amplifications.

64 The presence of eccDNA with functional genes in a cell can be a signature of a  
65 stress and/or function as a reservoir of genetic variation in which a cell may activate as  
66 a rapid response to stress. For example, oncogene amplification and expression via  
67 eccDNA in human cancers provides a unique mechanism for massive gene expression  
68 [24] and ultimately a reservoir of genetic heterogeneity by which cancer cells have a  
69 selective advantage for aggressive behavior and persistence [13].

70 Recently, the genetic entity conferring resistance to the herbicide glyphosate in  
71 Palmer amaranth (*Amaranthus palmeri*), now termed the eccDNA replicon, was  
72 revealed to be a massive, 399 kb extrachromosomal circular DNA (eccDNA) [25, 26].  
73 Glyphosate resistance in Palmer amaranth is achieved through replicon amplification  
74 with simultaneous gene copy amplification and expression of the 5-  
75 enoylpyruvylshikimate-3-phosphate synthase (*EPSPS*) gene and its product, EPSP  
76 synthase [27], which is the herbicide target of glyphosate [28]. Glyphosate resistance  
77 may occur with as few as 5 copies of *EPSPS*. The increase in *EPSPS* functions to  
78 ameliorate the unbalanced or unregulated metabolic changes, such as shikimate  
79 accumulation, loss of aromatic amino acids, phenolic acids for lignin synthesis, and  
80 structural intermediates for plant growth regulators associated with glyphosate activity in  
81 sensitive plants [27, 29]. Isolation and single-molecule sequencing of the replicon

82 resulted in a single copy of the *EPSPS* gene along with 58 other predicted genes whose  
83 broad functions traverse detoxification, replication, recombination, DNA binding, and  
84 transport [26, 30]. Gene expression profiling of the replicon under glyphosate treatment  
85 showed transcription of 41 of the 59 genes in GR biotypes, with high expression of  
86 *EPSPS*, aminotransferase, zinc-finger, and several uncharacterized proteins [26, 30].

87 Repeat sequences and mobile genetic elements have been associated with  
88 eccDNA formation [4, 6, 18, 20, 30, 31] in higher eukaryotes. The repeat landscape of  
89 the replicon is described as a complex arrangement of repeat sequences and mobile  
90 genetic elements interspersed among arrays of clustered palindromes which may  
91 function in stability, DNA duplication and/or a means of nuclear integration [26]. In a  
92 follow up study, sequence analysis identified a region in the replicon with elevated A+T  
93 content and an exact match to a conserved eukaryotic extended autonomous  
94 consensus sequence (EACS) [32]. Surrounding this sequence were multiple DNA  
95 unwinding elements (DUE), which together are often associated with DNA bending and  
96 origins of replication and typically found near EACS [33, 34]. Regions flanking these  
97 elements in the replicon were cloned into an ARS-less yeast plasmid which resulted in  
98 colony formation, suggesting autonomous replication as the mechanism for the replicon  
99 increases in copy number [35].

100 Initial low-resolution FISH analysis of GR *A. palmeri* showed the amplified  
101 *EPSPS* gene was randomly distributed in the genome, suggesting a possible  
102 transposon-based mechanism of mobility [27]. A follow up study using much longer  
103 bacterial artificial chromosome (BAC) probes coupled with high resolution fiber  
104 extension microscopy verified the eccDNA replicon and identified various structural

105 polymorphisms including intact, circular, dimerized circular, and linear forms [25].  
106 Additionally, this study resolved a critical question regarding the maintenance  
107 mechanism that explains uneven segregation of glyphosate resistance among  
108 progenies – genomic tethering. Analysis of fiber-FISH images with replicon probes and  
109 meiotic pachytene chromosomes revealed very clear, single signals [25]. If the replicon  
110 were integrated into the genome, then double signals would be evident, suggesting a  
111 tethering mechanism as a means of genomic persistence to daughter cells during cell  
112 division [25]. Other genetic entities that maintain genomic persistence through tethering  
113 include DNA viruses such as Epstein-Barr, Rhadinovirus, Papillomavirus, and others  
114 [36].

115         Glyphosate resistance in Palmer amaranth has been observed in individuals with  
116 *EPSPS* copy numbers that range from 5-150 copies [27, 37, 38]. Amplification of the  
117 *EPSPS* gene correlated with amplification of flanking genes and sequence [26, 30],  
118 which suggests a large amplification unit and genome size enlargement in cells with  
119 many replicon copies [30]. Flow cytometry verified significant genome expansion in  
120 plants with high copy numbers (eg. 11% increase in genome size with ~100 extra  
121 copies of the replicon), seemingly without fitness penalty [30].

122         Glyphosate resistance in Palmer amaranth was originally reported in Georgia in  
123 the early 2,000's [39], and a recent analysis using whole genome shotgun sequencing  
124 verified that the replicon was present and intact in GR Palmer amaranth populations  
125 across the USA [40, 41]. This study also reported a lack of replicon SNP variation  
126 among GR eccDNAs from geographically distant states when aligned to the Mississippi  
127 replicon reference [26]. The replicon was not present in GS individuals, which supports

128 a single origin hypothesis and spread of the replicon across the USA through  
129 mechanical means such as spread of GR pollen in contaminated plant products, on  
130 farm equipment, and cattle movement, or via pollen.

131 The genomic mechanisms, origins and how the replicon assembled and gave  
132 rise to eccDNA in Palmer amaranth remains elusive, but the above studies lead to a  
133 couple of hypotheses: 1) the eccDNA replicon formed through intramolecular  
134 recombination among distal parts of the nuclear genome in short evolutionary time, or 2)  
135 there may exist a reservoir of smaller eccDNAs that are basal in the cell that may have  
136 the ability to recombine to assemble larger units as part of a dynamic response to  
137 stress. In this study, we report the presence and sequence characterization of an  
138 abundant reservoir of eccDNAs in both GS and GR biotypes using single molecule  
139 sequencing and the CIDER-Seq approach [18]. We examine the similarities and  
140 differences among samples representing distant geographic locations reported in [41],  
141 quantitate their abundance and diversity and assess whether recombination may be  
142 possible to form larger multimeric units.

## 143 **Results**

144

### 145 **EccDNA content and coding structure in geographically** 146 **distributed *A. palmeri***

147           Following the general methods and recommended computational pipelines  
148 outlined in the CIDER-Seq single-molecule approach [42], we identified an extensive  
149 amount of variable-sized eccDNA in all samples of (GS) and GR) biotypes that were  
150 sequenced [Table 1]. The number of unique eccDNAs detected in GS samples ranged  
151 from 443 (ks\_s) to 6,227 (ms\_s) with a mean of 2,661 [Table 1]. Unique eccDNAs were  
152 in much higher abundance in GR samples and ranged from 2,200 (az\_r) to 5,650  
153 (ms\_r), with a mean of 4,448, nearly double that of GS [Table 1]. Length distributions of  
154 eccDNA were similar among both GS and GR biotypes and ranged from 27bp to nearly  
155 27kb, with mean lengths of around 6kb, [Table 1 and Fig 1]. Gene prediction resulted in  
156 eccDNAs both with and without complete open reading frames. In GS samples, the  
157 number of eccDNAs with predicted genes ranged from 76-505 with a mean of 272  
158 eccDNAs with genes per sample. GR eccDNAs with predicted genes was nearly 4  
159 times greater with a range of 263-1,179 and a mean of 718 eccDNA with genes per  
160 sample, suggesting that glyphosate stress influenced unique gene focal amplifications  
161 [Table 1]. Of the eccDNA with predicted genes, the number of predicted genes per  
162 eccDNA ranged from 1 to 10, with an average of 2 genes per eccDNA in both GS and  
163 GR [S1 and S2 Tables]. Transfer RNAs (tRNA) were predicted exclusively on eccDNA  
164 without CDS sequences and ranged widely from 46-715 (average of 350 per sample) in  
165 GS and samples and 130-528 (average of 364 per sample).

166

167

168

**Table 1.** EccDNA characterization of GS and GR biotypes.

| Sample biotype | #       | # eccDNA with Genes | # eccDNA with tRNA | % eccDNA with CDS | Length       | Mean length |
|----------------|---------|---------------------|--------------------|-------------------|--------------|-------------|
|                | eccD NA |                     |                    |                   | Distribution |             |
| ks_s           | 443     | 76                  | 46                 | 17                | 60-22,237    | 5,906       |
| ga_s           | 1564    | 257                 | 183                | 16                | 57-22,477    | 6,273       |
| az_r           | 2200    | 263                 | 130                | 12                | 42-16,029    | 4461        |
| az_s           | 2410    | 251                 | 148                | 10                | 66-19,859    | 3999        |
| ks_r           | 3234    | 578                 | 267                | 18                | 35-23,960    | 6,400       |
| de_r           | 4653    | 967                 | 467                | 21                | 28-26,413    | 6668        |
| ga_r           | 5138    | 978                 | 528                | 19                | 30-23,670    | 6618        |
| ms_r           | 5650    | 347                 | 458                | 6                 | 27-23,400    | 7,088       |
| md_r           | 5817    | 1179                | 553                | 20                | 30-27,000    | 6,872       |
| ms_s           | 6227    | 505                 | 715                | 8                 | 30-24,870    | 6,744       |

169

**Fig 1. Frequency polygon graph for Lengths (bp) of *A. palmeri* eccDNAs.** A) Glyphosate sensitive samples were sourced from Arizona (az\_s), Georgia (ga\_s), Kansas (ks\_s), and Mississippi (ms\_s) *A. palmeri* plants. B) Glyphosate resistant samples were sourced from Arizona (az\_r), Delaware (de\_r), Georgia (ga\_r), Kansas (ks\_r), Maryland (md\_r), and Mississippi (ms\_r) plants.

170 **Coding content of eccDNAs in glyphosate sensitive and**  
171 **resistant *A. palmeri***

172 Gene content from both GS and GR biotypes was compared to identify unique  
173 and common functional protein coding domains among the geographically distant  
174 samples. In GS biotypes, 9 functional protein coding domains were discovered that are  
175 common among the each of the states [Fig 2]. These functional domains are annotated  
176 as ATP synthase, cytochrome P450, protein kinase, ribosomal protein, NADH  
177 dehydrogenase, Clp protease, and oxidoreductase [Table 2]. Various pairwise  
178 combinations of GS *A. palmeri* biotypes shared a range of 1 to 12 elements [Fig 2 and  
179 S3 Table]. Genes that regulate cell division, such as the Ras protein family and those  
180 involved in DNA replication (helicase) were common among Arizona, Georgia, and  
181 Mississippi GS eccDNA samples [S3 Table].

**Fig 2. Venn diagram of PFAM elements shared by GS eccDNA samples.** Arizona (az\_s),  
Georgia (ga\_s), Kansas (ks\_s), and Mississippi (ms\_s) sensitive *A. palmeri* eccDNA shared 9 total

182

183

| <b>Table 2.</b> Gene elements shared by all sensitive eccDNA samples. |                       |                                                           |
|-----------------------------------------------------------------------|-----------------------|-----------------------------------------------------------|
| <b>Total</b>                                                          | <b>PFAM Accession</b> | <b>Annotation</b>                                         |
| 9                                                                     | PF00006               | ATP synthase alpha/beta family, nucleotide-binding domain |
|                                                                       | PF00067               | Cytochrome P450                                           |
|                                                                       | PF00069               | Protein kinase domain                                     |

|         |                                                     |
|---------|-----------------------------------------------------|
| PF00164 | Ribosomal protein S12/S23                           |
| PF00181 | Ribosomal Proteins L2, RNA binding domain           |
| PF00346 | Respiratory-chain NADH dehydrogenase, 49 Kd subunit |
| PF00411 | Ribosomal protein S11                               |
| PF00574 | Clp protease                                        |
| PF01058 | NADH ubiquinone oxidoreductase, 20 Kd subunit       |

184

185           Several abiotic/biotic resilience-related functional protein domains were found in  
186 Arizona and Mississippi GS samples that includes an oxysterol-binding protein,  
187 pectinesterase, NmrA-like family, and WRKY DNA-binding domain elements [S3 Table].  
188 Also discovered were shared functional domains involved in DNA methylation and  
189 histone maintenance (H2A/H2B/H3/H4) [S3 Table]. Common between Georgia and  
190 Mississippi GS biotypes were ABC transporter and Cytochrome C oxidase subunit II  
191 (periplasmic domain) protein domains [S3 Table]. Unique to Arizona were response  
192 regulators such as trehalose-phosphatase, chalcone-flavanone isomerase, O-  
193 methyltransferase, Myb-like DNA-binding domain [S3 Table]. Hundreds of other unique  
194 functional domains in different GS biotypes were recorded in S3 Table. It is notable that  
195 the *EPSPS* gene was not found in any of the GS eccDNAs.

196           In GR biotypes, we identified a total of 20 functional protein domains that are  
197 shared among all 6 resistant samples [Fig 3 and Table 3]. The shared GR domains had  
**Fig 3. Venn diagram of PFAM elements shared among GR *A. palmeri* eccDNA samples.** Arizona  
(az\_r), Delaware (de\_r), Georgia (ga\_r), Kansas (ks\_r), Maryland (md\_r), and Mississippi (ms\_r) resistant  
*A. palmeri* eccDNA shared 20 total PFAM elements.

198 various cellular maintenance functions in addition to stress response domains that  
199 include ABC transporter, HSP70 protein, Ribosomal protein, WD domain, and Leucine  
200 rich repeats [Table 3]. A range of 1 to 9 protein family domains were shared by at least  
201 5 of the GR biotypes [Fig 3 and S4 Table]. No apical meristem (NAM) protein,  
202 peroxidase, TCP-1/cpn60 chaperonin family are among the stress response elements.  
203 Arizona, Delaware, Kansas, and Maryland GR biotypes all contained EPSP synthase  
204 (3-phosphoshikimate 1-carboxyvinyltransferase) and Arabidopsis phospholipase-like  
205 protein (PEARLI 4) functional domains, with 21 and 24 copies distributed across various  
206 eccDNA within these four samples respectively.  
207

| <b>Total</b> | <b>PFAM Accession</b> | <b>Annotation</b>                                               |
|--------------|-----------------------|-----------------------------------------------------------------|
| 20           | PF00004               | ATPase family associated with various cellular activities (AAA) |
|              | PF00005               | ABC transporter                                                 |
|              | PF00006               | ATP synthase alpha/beta family, nucleotide-binding domain       |
|              | PF00012               | HSP70 protein                                                   |
|              | PF00067               | Cytochrome P450                                                 |
|              | PF00069               | Protein kinase domain                                           |
|              | PF00076               | RNA recognition motif. (a.k.a. RRM, RBD, or RNP domain)         |
|              | PF00164               | Ribosomal protein S12/S23                                       |
|              | PF00181               | Ribosomal Proteins L2, RNA binding domain                       |

|         |                                                     |
|---------|-----------------------------------------------------|
| PF00306 | ATP synthase alpha/beta chain, C terminal domain    |
| PF00346 | Respiratory-chain NADH dehydrogenase, 49 Kd subunit |
| PF00400 | WD domain, G-beta repeat                            |
| PF00411 | Ribosomal protein S11                               |
| PF00481 | Protein phosphatase 2C                              |
| PF00574 | Clp protease                                        |
| PF01058 | NADH ubiquinone oxidoreductase, 20 Kd subunit       |
| PF02874 | ATP synthase alpha/beta family, beta-barrel domain  |
| PF03947 | Ribosomal Proteins L2, C-terminal domain            |
| PF07714 | Protein tyrosine and serine/threonine kinase        |
| PF13855 | Leucine rich repeat                                 |

208

## 209 **Gene ontology enrichment of *A. palmeri* eccDNA**

210 Gene ontology enrichment analysis of predicted coding elements on eccDNA of  
211 GS eccDNA revealed a variety of enriched biological processes, cellular components,  
212 and molecular functions encoded on eccDNA [Fig 4]. Enriched biological processes  
213 include regulation of transcription, membrane and lipid transport, DNA binding, fatty acid  
214 biosynthesis, protein phosphorylation, oxidation-reduction, chromatin maintenance, and  
215 protein translation [Fig 4a and S5 Table]. Cellular component and molecular function

**Fig 4.** Gene ontology enrichment terms and their prevalence among GS *A. palmeri* eccDNA samples. **A.** Biological processes, **B.** cellular components, **C.** molecular functions.

216 categories of interest include membrane and ribosome components [Fig 4b], cytoplasm,  
217 protein kinase activity, and ATP binding [Fig 4c].

218         Glyphosate resistant eccDNAs showed similar, but slightly different enriched  
219 biological processes such as transmembrane transport, translation, protein  
220 phosphorylation, and oxidation-reduction process [Fig 5a]. Ribosome, nucleus,  
221 membrane, and integral component of membrane were also enriched in the cellular  
222 component category [Fig 5b]. Representative molecular functions for GR eccDNA were  
223 mainly in the ribosome and membrane categories, but ATP binding, protein kinase  
224 activity, and catalytic activity were enriched [Fig 5c and S6 Table].

**Fig 5.** Gene ontology enrichment terms and their prevalence among GR *A. palmeri* eccDNA samples. **A.**  
Biological processes, **B.** cellular components, **C.** molecular functions.

225

## 226 **Repeat structure of *A. palmeri* eccDNA**

227         Repeat characterization revealed a high proportion of repetitive sequences  
228 among both GS and GR eccDNAs [S7 Table]. The most common repeat classes were  
229 simple repeats, long terminal repeats (LTR) from the Copia superfamily, low complexity  
230 regions, and LTR from the Gypsy superfamily [S7 Table]. Interestingly, simple repeat  
231 content varied drastically among the GR and GS states. For example, Arizona and  
232 Mississippi GS and GR pairs were closely balanced in terms of content, but Mississippi  
233 has nearly 6 times as many with ~17.5k compared to ~4k simple repeats [S7 Table].  
234 The Long Terminal Repeats/Copia class was second in abundance among eccDNAs,  
235 followed by low complexity repeats and then Gypsy elements. DNA elements such as

236 Stowaway, LINES, Cassandra, hAT-Tip100, MULE-MuDR, and helitrons were also  
237 identified in both GS and GR biotypes [S7 Table].

238

239 **Similarity to the eccDNA replicon and replication origins on**  
240 **eccDNAs in *A. palmeri***

241 Alignment and comparative analysis for coding content and conserved sequence  
242 structure between GS and GR eccDNAs and the eccDNA replicon [26] identified a total  
243 of 162 GS eccDNA and 2,547 GR eccDNA with at matches at least 100 bp in length

244 with a percent identify of at least 95% [Fig 6]. A total of 7 and 11 eccDNA replicon  
245 genes were predicted in GS and GR eccDNA, respectively [S8 Table]. Predicted

**Fig 7. *EPSPS* gene copies in GR eccDNA.** A. Sequence similarity of GR eccDNA aligned to the eccDNA replicon. Blue and orange links indicate single or duplicated *EPSPS* genes. Grey links show broader sequence similarities. B. Self-alignment of the GR eccDNA containing multiple *EPSPS* copies. Blue dots indicate inverted repeat sequences and red dots indicate repetitive sequence in the forward direction.

**Fig 6. Alignment of eccDNA to the replicon in GS and GR biotypes.** A. Alignment of 162 GS eccDNA to the eccDNA replicon. B. Alignment of 2,547 GR eccDNA to the eccDNA replicon. Red colors indicate indirect orientation and blue are direct. Alignments are filtered for matches of at least  
246 eccDNA replicon genes in GS eccDNA include PEARLI4, Heat shock (HSP70), no  
247 apical meristem (NAM), replication factor-A, retrotransposon, zinc finger, and  
248 suppressor of gene silencing [S8 Table]. GR predicted replicon genes include: *EPSPS*,  
249 PEARLI4, Domain of unknown function (DUF), ethylene response factor, HSP70, NAM,  
250 replication factor A, and retrotransposon [S8 Table]. Interestingly, several GR eccDNA  
251 contained multiple copies of the *EPSPS* gene from Arizona, Delaware, Kansas, and  
252 Maryland, while the *EPSPS* gene was not present on any eccDNA in GS [Fig 7A].

253

254 In GR eccDNA we identified 5 eccDNA with 2 copies of the *EPSPS* gene and 11  
255 eccDNA with a single *EPSPS* copy [Fig 7A]. A self-alignment of the GR *EPSPS*  
256 eccDNA shows many conserved direct and indirect repeats [Fig 7B] with very high  
257 sequence identity (>95% with at least 100bp). Palindromic repeats that flank the  
258 *EPSPS* gene, previously described as possible genome tethering sites [26], were also  
259 evident among various eccDNA (Grey links in A and on the top right corner of B)

260 indicating the potential for recombination among these smaller eccDNA, relative to the  
261 replicon.

262 Previous work has implicated a 17bp extended autonomous consensus  
263 sequence (EACS) with a motif of WWWTTTAYRTTTWGTT that contains a core 11bp  
264 autonomous consensus sequence (ACS) reported in yeast [43] as a sequence where  
265 replication machinery initiates autonomous replication in plants [33]; which was  
266 functionally verified in the eccDNA replicon [35] [Fig 8]. Analysis of the GS and GR  
267 eccDNA for autonomous consensus (ACS) sequences (ACS) [43] identified a total of

**Fig 8. Extended autonomous consensus sequence sequence (EACS) presented in [34].** The core autonomous consensus sequence is highlighted with the TAYR motif highlighted as the origin of replication complex binding site (ORC) and the TTT motif highlighted as a helicase binding site. 'W' denotes A or T, 'Y' denotes C or T, 'R' denotes G or A.

268 430 unique eccDNA with 16 of the 17 bp present in the EACS with the common missing  
269 base being the first 'W' (A or T), several of which had multiple EACS sequences [Fig 8  
270 and S9 Table]. A total of 36,237 core ACS sites (11bp) were predicted within 18,679  
271 unique eccDNA out of the total 37,336 predicted eccDNAs implicating this sequence as  
272 a possible common origin of replication sequence among smaller eccDNA in  
273 *Amaranthus palmeri*. Of the eccDNA that contained ARS sequences, 2,785 were  
274 predicted to contain coding sequences, whereas 16,048 eccDNA did not contain an  
275 ARS sequence.

## 276 **Genomic origins of eccDNAs in *A. palmeri***

277 To determine the genomic origins of eccDNA and the possibility of genomic  
278 regions with a disposition for eccDNA formation, GS and GR eccDNA were mapped to

279 the chromosome scaffolded *Amaranthus palmeri* assembly [44] and counted using non-  
280 overlapping genomic windows of 500kb [Fig 9]. We identified several regions of the  
281 genome with a very high disposition for focal amplifications that are conserved between  
282 GS and GR. These regions include the distal end of chromosome 2 and near the center  
283 of chromosome 3, and several other regions distributed throughout the genome [Fig 9a].  
284 The 500kb window localized at the distal end of chromosome 2 contained 285 eccDNA  
285 from GS and 469 from GR [Fig 9a and S10 Table]. The center of chromosome 3

**Fig 9. A.** Alignment and quantification of unique eccDNA of GS (red) and GR (blue) to the  
chromosome-scale Palmer amaranthus reference assembly in 500kb non-overlapping windows.  
Darker colors represent a larger abundance of mapped eccDNA. Regions with the dotted  
ellipses indicate a high abundance of mapped eccDNA. **B.** Self-alignment of the 6 highlighted  
regions from A. Red dots indicated direct repeats, while blue are indirect. Regions highlighted in  
yellow are derived from the 2 genomic regions (2 & 3 - 500kb each) with the highest  
abundance of mapped eccDNA.

286 contained 225 GS and 449 GR eccDNA. The genomic region of eccDNA origin among  
287 GR samples with the most eccDNA was on chromosome 4 with 487 eccDNA and only  
288 51 from GS, suggesting a possible signal of glyphosate stress. Extraction and self-  
289 alignment of the 6 genomic windows from the Palmer amaranth chromosome scale  
290 assembly from [44] revealed intricate arrays of repetitive sequence [Fig 9b]. Short,  
291 inverted repeats were the most common among all 6 regions [Fig 9b]. Clustered  
292 palindromes of various sizes were discovered in segments 2, 3, 4, and 5, as indicated  
293 by box-like structures. Regions 2 and 3 (highlighted in Fig 9b) contained more complex  
294 repetitive structure with larger direct repeats (region 2) and indirect repeats (region 3)  
295 [Fig 9b].

296

## 297 **Discussion**

298           Gene copy number variation is a predominant mechanism by which organisms  
299 respond to selective pressures in nature. Focal amplifications of transcriptionally active  
300 chromatin as eccDNAs have been found in both abundance and diversity across higher  
301 and lower order eukaryotic species underpinning their importance as a vehicle for gene  
302 copy amplification. Advancements of single molecule sequencing and approaches to  
303 purify and directly sequence circular DNA have led to evidence that eccDNA may have  
304 a fundamental role in the cell and function and also function as a source of genetic  
305 heterogeneity in response to environmental pressures [1-4, 22, 26, 31, 42]. Previous  
306 work in *Palmer amaranth* demonstrated that several genes in addition to *EPSPS* were  
307 co-amplified on a large eccDNA (~400kb) with sophisticated repetitive content and  
308 origins from distal segmental genomic regions [26]. This large eccDNA served as the  
309 vehicle for *EPSPS* gene copy amplification, but whether construction of this large  
310 eccDNA was the result of intramolecular recombination or recombination among a  
311 population of smaller eccDNA is unclear.

312           Using single molecule sequencing and the CIDER-Seq analytical pipeline [42],  
313 we identified diverse and abundant eccDNA species in both GS and GR biotypes  
314 collected from distal geographic regions that were previously reported [41]. The sizes of  
315 these eccDNA ranged from a few hundred base pairs to nearly 30kb in both biotypes  
316 and between 6 and 20% were predicted to contain genes which indicates that eccDNAs  
317 are present in *Amaranthus palmeri* without glyphosate exposure.

318 Gene enrichment analysis of both GS and GR eccDNA provided insight on  
319 biological processes and molecular functions enriched for activities related to a  
320 generalized stress response or important for rapid adaptation such as transcription  
321 regulation, development, chromatin, protein phosphorylation, oxidation-reduction,  
322 ribosomal and membrane components, protein kinase activity, and ATP binding. This  
323 indicates that eccDNAs may have a role in preserving important protein synthesis  
324 genes. Notably, transfer RNAs (tRNA) were predicted to reside on eccDNA in both GS  
325 and GR samples, but only on eccDNA that do not contain coding sequences. This was  
326 also shown by Wang et al., 2021 in *Arabidopsis* [19] and suggests that protein synthesis  
327 is a key attribute or component of the early response to stress and or the adaptive  
328 response. This finding also suggests that regulation of protein synthesis is perhaps as  
329 driven by eccDNA is an independent component of selection and directed gene focal  
330 amplifications as eccDNA. Furthermore, plants likely require additional copies of these  
331 protein synthesis genes for stress responses to produce significant immunity or defense  
332 products, as is the case for GR *A. palmeri* [1]. For example, transmembrane transport  
333 has been shown to play an important role in adaptation of *Arabidopsis* to metalliferous  
334 soils [45], resource allocation and sensing under plant abiotic stress [46-48] and were  
335 enriched on GS *Palmer amaranth* eccDNA. Fatty acid biosynthesis is another category  
336 of enriched genes on GS eccDNA which has been implicated in signaling and plant  
337 defense to pathogens [49, 50].

338 At the gene level, there were a core set of 9 functional protein coding domains in  
339 common among the GS samples. Ribosomal proteins (circular rDNA), which are  
340 commonly reported as functional genes among eccDNA, were found among all 9 GS

341 samples suggesting a common role for rDNAs as circular structures in plants [6, 31, 51,  
342 52]. Interestingly, Cytochrome p450 and Clp protease domains were also present in  
343 each of the GS samples. Cytochrome p450s are a superfamily of genes that perform a  
344 suite of functions in plant development and protection from various stresses via multiple  
345 biosynthetic and detoxification pathways. Cytochrome p450 activity plays a central role  
346 detoxification of xenobiotics in various weed species [53-56], biosynthesis of hormones,  
347 fatty acids, sterols, cell wall components, biopolymers, and various defense compounds  
348 [57]. Clp proteases are proteolytic enzymes whose increased expression also play a  
349 protective role for the plant in both abiotic and biotic stress [58-60]. Clp proteases help  
350 maintain protein homeostasis in chloroplasts and remove nonfunctional proteins, which  
351 is essential during stress episodes when proteins tend to be more vulnerable to damage  
352 [20–22]. These core genes encoded on GS eccDNA may contribute Palmer amaranth's  
353 innate ability to rapidly adapt.

354 GS biotypes shared the same 9 core functional domains as GS biotypes  
355 including Cytochrome p450 and Clp protease, in addition to 11 other domains indicating  
356 that eccDNAs are dynamic and their presence and coding structure may be the result of  
357 selective pressures. Notably, the additional functional domains in GR biotypes include  
358 additional ribosomal motifs, ABC transporters, HSP70 proteins, and leucine rich repeat  
359 (LRR) domains. ABC transporters are important for detoxification, environmental  
360 stresses and pathogen resistance [23] and may play a complementary role in  
361 glyphosate detoxification in addition to *EPSP* synthase over accumulation. The most  
362 abundant functional domain and conserved among all the samples is the HSP70  
363 domain; which functions in protein maintenance and a wide variety of stress response

364 mechanisms such as response to high temperatures [61], and was also a predicted  
365 gene on the eccDNA replicon [26]. Hsp70 have been reported to function by holding  
366 together protein substrates to help in movement, regulation, and prevent aggregation  
367 under physical and or chemical pressure in plants [61, 62] and have served as  
368 functional target in improving abiotic stress resilience in *Arabidopsis* [63] and other  
369 species. It is notable that the HSP70 is present in both GS and GR biotypes but is a  
370 core gene shared among all GR biotypes. The presence of Hsp70 on eccDNA  
371 suggests a possible role in glyphosate resistance, or perhaps, a genomic mechanism  
372 for rapid mitigation of heat and other abiotic stresses. Leucine rich repeat (LRR)  
373 domains are associated with protein-protein interactions, often as part of plant innate  
374 immune receptors [64]. Various transcription factors such as WRKY, bZIP, helicases,  
375 GATA (zinc finger), E2F, helix-loop-helix, TCP, and others were also predicted on *A.*  
376 *palmeri* eccDNA. Since transcription factor access to heterochromatin is limited by its  
377 compact structure, eccDNAs may provide a faster and more effective avenue for protein  
378 synthesis. Cancer cells with oncogenes encoded on eccDNAs appear to produce  
379 significantly more transcript copies compared to the same oncogenes encoded on linear  
380 DNA structures [14].

381         A primary question underlying the origins and structural dynamics of the large  
382 eccDNA replicon (~400kb) [25, 26] is the mechanism by which it is assembled. The  
383 most likely scenarios are long-range genomic interactions and a compounded building  
384 event over short evolutionary time; or intramolecular recombination between smaller  
385 eccDNA with newly selected genomic focal amplifications resulting from glyphosate  
386 stress to form the larger structure, again over short evolutionary time scales. Here we

387 show a moderate degree of eccDNA replicon coverage with GS eccDNA [Fig 6a],  
388 however there are large, disconnected gaps in coverage. It is notable that the *EPSPS*  
389 gene was not found on any GS biotype eccDNA in this study, while several other  
390 replicon genes were. One of the primary drawbacks to the CIDER-Seq methodology is  
391 the limitation of eccDNA size to the read length of the Pacific Biosciences Sequel II  
392 instrument [42] which means eccDNAs larger than an average read length will not be  
393 sequenced intact, such as the eccDNA replicon [26]. This limitation prevented the  
394 complete assembly of the *EPSPS* replicon, however the *EPSPS* gene and most other  
395 predicted eccDNA replicon genes were found in GR biotype eccDNA and coverage of  
396 the replicon was practically complete, with only a few small gaps. Furthermore, the  
397 *EPSPS* gene was found on smaller eccDNA in GR biotypes in multiple copies, which  
398 corroborates the work of Koo et al., that observed the extra-chromosomal *EPSPS* gene  
399 vehicle as multi-meric forms. [25]. Together, these results suggest that eccDNA are  
400 present as a basal source of genetic heterogeneity or rapid response mechanism, are  
401 selectively amplified, and the large eccDNA structure reported to confer glyphosate  
402 resistance is likely built by recombination among smaller eccDNA over rapid  
403 evolutionary timescales.

404 Another important observation and similarity with the eccDNA replicon are the  
405 high abundance and seemingly random distribution of the core 11bp autonomous  
406 consensus sequence and a longer more conserved 16bp extended autonomous  
407 consensus sequence [43] among approximately half of the GS and GR eccDNA. The  
408 greater abundance seems to be on eccDNA without coding sequences. These  
409 sequences were previously verified to function in autonomous replication and may be

410 regulated mechanism, perhaps epigenetic or other, to maintain gene copy numbers in  
411 *A. palmeri*. In the eccDNA replicon, there is a single copy of the 17bp consensus  
412 sequence and 46 copies of the 11bp sequence, seemingly randomly distributed among  
413 the replicon [26, 35]. This observation further supports the possibility that the eccDNA  
414 replicon is the result of recombination among smaller eccDNA. It is also possible that  
415 there are alternate mechanisms or origins of replication on eccDNA in *A. palmeri* that  
416 are used to maintain and amplify copy number. Previous work showed that the coding  
417 components of the eccDNA replicon seem to be derived from distal regions of the  
418 genome [26], and evidence presented here show that eccDNA in both GS and GR  
419 seem to originate from all over the genome, Fig 9a. Here, we also demonstrate that  
420 there are segments of the genome, or perhaps a genomic context, with a disposition for  
421 focal amplifications. These genomic ‘hotspots’ are comprised of various repeat  
422 structures that may have facilitate eccDNA formation. There are also regions of the  
423 genome that seem to be activated as ‘hotspots’ in response to glyphosate stress that  
424 suggests eccDNA formation may also be a directed event, rather than random. It is still  
425 unclear if genes need to be in the ‘right’ genomic context for a focal amplification to  
426 occur, or if other regulatory/initiation mechanisms exist. This work provides evidence  
427 that eccDNA are a basal component of the cell and likely function as a reservoir of  
428 genetic heterogeneity in *A. palmeri* as part of the rapid adaptation program.

429

## 430 **Materials and methods**

### 431 **Plant material and genomic DNA extraction**

432 Seeds were collected from individual GR plants that had survived glyphosate  
433 application as previously described [30, 41]. Plants were grown in 9 × 9 × 9 cm plastic  
434 pots that contained a commercial potting mix (Metro-Mix 360; Sun Gro Horticulture,  
435 Bellevue, WA, USA). Seeds were sown on the potting mix surface and lightly covered  
436 with 2 mm of potting mix. Pots were sub-irrigated and maintained in a greenhouse set at  
437 a temperature regime of 30/25 °C (day/night) and a 15-h photoperiod under natural  
438 sunlight conditions supplemented with high-pressure sodium lights providing 400 μmol  
439 m<sup>-2</sup> s<sup>-1</sup>. Sampling for whole genome sequencing was performed using a leaf from the  
440 third node of two representative plants from each population. Total DNA was extracted  
441 using a modified CTAB-based protocol with chloroform, isopropanol, and RNase A  
442 buffer [65]. Briefly, leaf material from each sample (approximately 20-100 mg) was  
443 ground into a fine powder using a mortar and pestle with liquid nitrogen, extracted with  
444 CTAB buffer, chloroform extracted, and ethanol precipitated. Total genomic DNA was  
445 resuspended in 50 μl of TE (10 mM Tris, 0.1 m MEDTA, pH 8.0) buffer containing  
446 RNaseA. The tube was incubated at 37°C for 30 minutes and stored at -20°C.

447

## 448 **EccDNA enrichment and sequencing (CIDER-seq)**

449 Circular DNA enrichment sequencing (CIDER-Seq) was used to enrich, sequence, and  
450 analyze eccDNAs from the leaf tissue DNA extraction samples according to the protocol  
451 by Mehta et al., [17]. Because we wanted to survey the landscape of eccDNA, we did  
452 not perform a size exclusion step prior to enrichment. Otherwise, the circular DNA  
453 amplification, debranching reaction, and DNA branch release and repair stages closely

454 followed the methods of Mehta et al., [42]. Enriched eccDNA for each sample [10] was  
455 individually barcoded following the manufacturer's recommended protocol (Pacific  
456 Biosciences), pooled in equimolar amounts, and sequenced on a Sequel II single  
457 molecule sequencer (Pacific Biosciences).

## 458 **EccDNA sequence processing and analysis**

459         Raw sequence reads were demultiplexed and circular consensus sequences  
460 analyzed with the SMRT link software (Pacific Biosciences). Parameters for CCS  
461 analysis were stringent and include: 1) predicted quality = 0.999; and 2) minimum read  
462 length = 1,000 bp. Processed reads were stored as .fastq files. Processed fastq files  
463 were analyzed with the packaged CIDER-seq software using the suggested approach to  
464 identify circular DNA. Predicted eccDNA were matched to the *A. palmeri* reference  
465 genome by Montgomery et al., [44]. After processing of predicted eccDNA, shorter  
466 duplicate eccDNAs were collapsed into the longest reference eccDNA with the CDhit  
467 software [66] with an identity threshold of 90%. Reference eccDNA were annotated for  
468 genuine open reading frames using the MAKER annotation pipeline [67] and evidence  
469 for genes derived from the *A. palmeri* published annotation [44]. Alignments to the  
470 reference genome were performed with the Minimap2 software [68] and comparative  
471 genome alignments performed with Mummer 4.0 [69]. Transfer RNAs were determined  
472 with the tRNAscan-SE software with default settings [70]. The *A. palmeri* reference  
473 assembly from [44] was divided into non-overlapping windows of 500kb and mapped  
474 eccDNA counted with BedTools [71].

## 475 **Acknowledgments**

## 476 **References**

- 477 1. Gaubatz JW. Extrachromosomal circular DNAs and genomic sequence plasticity  
478 in eukaryotic cells. *Mutat Res.* 1990;237(5-6):271-92. Epub 1990/09/01. doi:  
479 10.1016/0921-8734(90)90009-g. PubMed PMID: 2079966.
- 480 2. Cohen S, Regev A, Lavi S. Small polydispersed circular DNA (spcDNA) in  
481 human cells: association with genomic instability. *Oncogene.* 1997;14(8):977-85. Epub  
482 1997/02/27. doi: 10.1038/sj.onc.1200917. PubMed PMID: 9050997.
- 483 3. Cohen S, Menut S, Mechali M. Regulated formation of extrachromosomal circular  
484 DNA molecules during development in *Xenopus laevis*. *Mol Cell Biol.* 1999;19(10):6682-  
485 9. Epub 1999/09/22. doi: 10.1128/MCB.19.10.6682. PubMed PMID: 10490607; PubMed  
486 Central PMCID: PMCPMC84653.
- 487 4. Cohen S, Yacobi K, Segal D. Extrachromosomal circular DNA of tandemly  
488 repeated genomic sequences in *Drosophila*. *Genome Res.* 2003;13(6A):1133-45. Epub  
489 2003/06/12. doi: 10.1101/gr.907603. PubMed PMID: 12799349; PubMed Central  
490 PMCID: PMCPMC403641.
- 491 5. Moller HD, Parsons L, Jorgensen TS, Botstein D, Regenberg B.  
492 Extrachromosomal circular DNA is common in yeast. *P Natl Acad Sci USA.*  
493 2015;112(24):E3114-E22. doi: 10.1073/pnas.1508825112. PubMed PMID:  
494 WOS:000356251800007.
- 495 6. Moller HD, Mohiyuddin M, Prada-Luengo I, Sailani MR, Halling JF, Plomgaard P,  
496 et al. Circular DNA elements of chromosomal origin are common in healthy human  
497 somatic tissue. *Nat Commun.* 2018;9(1):1069. Epub 2018/03/16. doi: 10.1038/s41467-  
498 018-03369-8. PubMed PMID: 29540679; PubMed Central PMCID: PMCPMC5852086.

- 499 7. Dillon LW, Kumar P, Shibata Y, Wang YH, Willcox S, Griffith JD, et al. Production  
500 of Extrachromosomal MicroDNAs Is Linked to Mismatch Repair Pathways and  
501 Transcriptional Activity. *Cell Rep.* 2015;11(11):1749-59. doi:  
502 10.1016/j.celrep.2015.05.020. PubMed PMID: WOS:000356863600008.
- 503 8. Tomaska L, Nosek J, Kramara J, Griffith JD. Telomeric circles: universal players  
504 in telomere maintenance? *Nat Struct Mol Biol.* 2009;16(10):1010-5. Epub 2009/10/08.  
505 doi: 10.1038/nsmb.1660. PubMed PMID: 19809492; PubMed Central PMCID:  
506 PMCPMC4041010.
- 507 9. Mazzucco G, Huda A, Galli M, Piccini D, Giannattasio M, Pessina F, et al.  
508 Telomere damage induces internal loops that generate telomeric circles. *Nature*  
509 *Communications.* 2020;11(1). doi: ARTN 5297  
510 10.1038/s41467-020-19139-4. PubMed PMID: WOS:000585935900004.
- 511 10. Hull RM, Houseley J. The adaptive potential of circular DNA accumulation in  
512 ageing cells. *Curr Genet.* 2020;66(5):889-94. Epub 2020/04/17. doi: 10.1007/s00294-  
513 020-01069-9. PubMed PMID: 32296868; PubMed Central PMCID: PMCPMC7497353.
- 514 11. Yan Y, Guo G, Huang J, Gao M, Zhu Q, Zeng S, et al. Current understanding of  
515 extrachromosomal circular DNA in cancer pathogenesis and therapeutic resistance. *J*  
516 *Hematol Oncol.* 2020;13(1):124. Epub 2020/09/16. doi: 10.1186/s13045-020-00960-9.  
517 PubMed PMID: 32928268; PubMed Central PMCID: PMCPMC7491193.
- 518 12. Wang T, Zhang H, Zhou Y, Shi J. Extrachromosomal circular DNA: a new  
519 potential role in cancer progression. *J Transl Med.* 2021;19(1):257. Epub 2021/06/12.  
520 doi: 10.1186/s12967-021-02927-x. PubMed PMID: 34112178; PubMed Central PMCID:  
521 PMCPMC8194206.

- 522 13. Turner KM, Deshpande V, Beyter D, Koga T, Rusert J, Lee C, et al.  
523 Extrachromosomal oncogene amplification drives tumour evolution and genetic  
524 heterogeneity. *Nature*. 2017;543(7643):122-5. Epub 2017/02/09. doi:  
525 10.1038/nature21356. PubMed PMID: 28178237; PubMed Central PMCID:  
526 PMCPMC5334176.
- 527 14. Tandon I, Pal R, Pal JK, Sharma NK. Extrachromosomal circular DNAs: an extra  
528 piece of evidence to depict tumor heterogeneity. *Future Sci OA*. 2019;5(6):FSO390.  
529 Epub 2019/07/10. doi: 10.2144/fsoa-2019-0024. PubMed PMID: 31285839; PubMed  
530 Central PMCID: PMCPMC6609892.
- 531 15. Wang M, Chen X, Yu F, Ding H, Zhang Y, Wang K. Extrachromosomal Circular  
532 DNAs: Origin, formation and emerging function in Cancer. *Int J Biol Sci*.  
533 2021;17(4):1010-25. Epub 2021/04/20. doi: 10.7150/ijbs.54614. PubMed PMID:  
534 33867825; PubMed Central PMCID: PMCPMC8040306.
- 535 16. Wu SH, Turner KM, Nguyen N, Raviram R, Erb M, Santini J, et al. Circular  
536 ecDNA promotes accessible chromatin and high oncogene expression. *Nature*.  
537 2019;575(7784):699-+. doi: 10.1038/s41586-019-1763-5. PubMed PMID:  
538 WOS:000500036800066.
- 539 17. Koche RP, Rodriguez-Fos E, Helmsauer K, Burkert M, MacArthur IC, Maag J, et  
540 al. Extrachromosomal circular DNA drives oncogenic genome remodeling in  
541 neuroblastoma. *Nat Genet*. 2020;52(1):29-34. Epub 2019/12/18. doi: 10.1038/s41588-  
542 019-0547-z. PubMed PMID: 31844324; PubMed Central PMCID: PMCPMC7008131.
- 543 18. Mehta D, Cornet L, Hirsch-Hoffmann M, Zaidi SSEA, Vanderschuren H. Full-  
544 length sequencing of circular DNA viruses and extrachromosomal circular DNA using

- 545 CIDER-Seq. *Nat Protoc.* 2020;15(5):1673-89. doi: 10.1038/s41596-020-0301-0.
- 546 PubMed PMID: WOS:000523115900001.
- 547 19. Wang K, Tian H, Wang L, Wang L, Tan Y, Zhang Z, et al. Deciphering  
548 extrachromosomal circular DNA in Arabidopsis. *Comput Struct Biotechnol J.*  
549 2021;19:1176-83. Epub 2021/03/09. doi: 10.1016/j.csbj.2021.01.043. PubMed PMID:  
550 33680359; PubMed Central PMCID: PMC7899950.
- 551 20. Navratilova A, Koblizkova A, Macas J. Survey of extrachromosomal circular DNA  
552 derived from plant satellite repeats. *BMC Plant Biol.* 2008;8:90. Epub 2008/08/30. doi:  
553 10.1186/1471-2229-8-90. PubMed PMID: 18721471; PubMed Central PMCID:  
554 PMCPMC2543021.
- 555 21. Kinoshita Y, Ohnishi N, Yamada Y, Kunisada T, Yamagishi H. Extrachromosomal  
556 Circular DNA from Nuclear Fraction of Higher-Plants. *Plant Cell Physiol.*  
557 1985;26(7):1401-9. PubMed PMID: WOS:A1985ASZ0400021.
- 558 22. Cohen S, Houben A, Segal D. Extrachromosomal circular DNA derived from  
559 tandemly repeated genomic sequences in plants. *Plant J.* 2008;53(6):1027-34. Epub  
560 2007/12/20. doi: 10.1111/j.1365-313X.2007.03394.x. PubMed PMID: 18088310.
- 561 23. Thieme M, Lanciano S, Balzergue S, Daccord N, Mirouze M, Bucher E. Inhibition  
562 of RNA polymerase II allows controlled mobilisation of retrotransposons for plant  
563 breeding. *Genome Biol.* 2017;18(1):134. Epub 2017/07/09. doi: 10.1186/s13059-017-  
564 1265-4. PubMed PMID: 28687080; PubMed Central PMCID: PMC5501947.
- 565 24. Wu S, Turner KM, Nguyen N, Raviram R, Erb M, Santini J, et al. Circular ecDNA  
566 promotes accessible chromatin and high oncogene expression. *Nature.*

- 567 2019;575(7784):699-703. Epub 2019/11/22. doi: 10.1038/s41586-019-1763-5. PubMed  
568 PMID: 31748743; PubMed Central PMCID: PMCPMC7094777.
- 569 25. Koo DH, Molin WT, Saski CA, Jiang J, Putta K, Jugulam M, et al.  
570 Extrachromosomal circular DNA-based amplification and transmission of herbicide  
571 resistance in crop weed *Amaranthus palmeri*. *P Natl Acad Sci USA*. 2018;115(13):3332-  
572 7. doi: 10.1073/pnas.1719354115. PubMed PMID: WOS:000428382400050.
- 573 26. Molin WT, Yaguchi A, Blenner M, Saski CA. The EccDNA Replicon: A Heritable,  
574 Extranuclear Vehicle That Enables Gene Amplification and Glyphosate Resistance in  
575 *Amaranthus palmeri*. *Plant Cell*. 2020;32(7):2132-40. doi: 10.1105/tpc.20.00099.  
576 PubMed PMID: WOS:000545974100017.
- 577 27. Gaines TA, Zhang W, Wang D, Bukun B, Chisholm ST, Shaner DL, et al. Gene  
578 amplification confers glyphosate resistance in *Amaranthus palmeri*. *Proc Natl Acad Sci*  
579 *U S A*. 2010;107(3):1029-34. Epub 2009/12/19. doi: 10.1073/pnas.0906649107.  
580 PubMed PMID: 20018685; PubMed Central PMCID: PMCPMC2824275.
- 581 28. Funke T, Han H, Healy-Fried ML, Fischer M, Schonbrunn E. Molecular basis for  
582 the herbicide resistance of Roundup Ready crops. *Proc Natl Acad Sci U S A*.  
583 2006;103(35):13010-5. Epub 2006/08/19. doi: 10.1073/pnas.0603638103. PubMed  
584 PMID: 16916934; PubMed Central PMCID: PMCPMC1559744.
- 585 29. Sammons RD, Gaines TA. Glyphosate resistance: state of knowledge. *Pest*  
586 *Manag Sci*. 2014;70(9):1367-77. Epub 2014/09/03. doi: 10.1002/ps.3743. PubMed  
587 PMID: 25180399; PubMed Central PMCID: PMCPMC4260172.
- 588 30. Molin WT, Wright AA, Lawton-Rauh A, Saski CA. The unique genomic landscape  
589 surrounding the EPSPS gene in glyphosate resistant *Amaranthus palmeri*: a repetitive

- 590 path to resistance. *BMC Genomics*. 2017;18(1):91. Epub 2017/01/18. doi:  
591 10.1186/s12864-016-3336-4. PubMed PMID: 28095770; PubMed Central PMCID:  
592 PMCPMC5240378.
- 593 31. Cohen S, Agmon N, Sobol O, Segal D. Extrachromosomal circles of satellite  
594 repeats and 5S ribosomal DNA in human cells. *Mob DNA*. 2010;1(1):11. Epub  
595 2010/03/17. doi: 10.1186/1759-8753-1-11. PubMed PMID: 20226008; PubMed Central  
596 PMCID: PMCPMC3225859.
- 597 32. Stinchcomb DT, Struhl K, Davis RW. Isolation and characterisation of a yeast  
598 chromosomal replicator. *Nature*. 1979;282(5734):39-43. Epub 1979/11/01. doi:  
599 10.1038/282039a0. PubMed PMID: 388229.
- 600 33. Eckdahl TT, Bennetzen JL, Anderson JN. DNA structures associated with  
601 autonomously replicating sequences from plants. *Plant Mol Biol*. 1989;12(5):507-16.  
602 Epub 1989/05/01. doi: 10.1007/BF00036965. PubMed PMID: 24271067.
- 603 34. Kowalski D, Eddy MJ. The DNA Unwinding Element - a Novel, Cis-Acting  
604 Component That Facilitates Opening of the Escherichia-Coli Replication Origin. *Embo J*.  
605 1989;8(13):4335-44. doi: DOI 10.1002/j.1460-2075.1989.tb08620.x. PubMed PMID:  
606 WOS:A1989CE21700044.
- 607 35. Molin WT, Yaguchi A, Blenner M, Saski CA. Autonomous replication sequences  
608 from the *Amaranthus palmeri* eccDNA replicon enable replication in yeast. *BMC Res*  
609 *Notes*. 2020;13(1):330. Epub 2020/07/12. doi: 10.1186/s13104-020-05169-0. PubMed  
610 PMID: 32650810; PubMed Central PMCID: PMCPMC7350638.
- 611 36. Feeney KM, Parish JL. Targeting mitotic chromosomes: a conserved mechanism  
612 to ensure viral genome persistence. *Proc Biol Sci*. 2009;276(1662):1535-44. Epub

- 613 2009/02/11. doi: 10.1098/rspb.2008.1642. PubMed PMID: 19203914; PubMed Central  
614 PMCID: PMCPMC2660980.
- 615 37. Gaines TA, Shaner DL, Ward SM, Leach JE, Preston C, Westra P. Mechanism of  
616 resistance of evolved glyphosate-resistant Palmer amaranth (*Amaranthus palmeri*). J  
617 Agric Food Chem. 2011;59(11):5886-9. Epub 2011/02/19. doi: 10.1021/jf104719k.  
618 PubMed PMID: 21329355.
- 619 38. Kupper A, Borgato EA, Patterson EL, Netto AG, Nicolai M, de Carvalho SJP, et  
620 al. Multiple Resistance to Glyphosate and Acetolactate Synthase Inhibitors in Palmer  
621 Amaranth (*Amaranthus palmeri*) Identified in Brazil. Weed Sci. 2017;65(3):317-26. doi:  
622 10.1017/wsc.2017.1. PubMed PMID: WOS:000405094400001.
- 623 39. Culpepper AS, Grey TL, Vencill WK, Kichler JM, Webster TM, Brown SM, et al.  
624 Glyphosate-resistant Palmer amaranth (*Amaranthus palmeri*) confirmed in Georgia.  
625 Weed Sci. 2006;54(4):620-6. doi: Doi 10.1614/Ws-06-001r.1. PubMed PMID:  
626 WOS:000239469200003.
- 627 40. Molin WT, Wright AA, VanGessel MJ, McCloskey WB, Jugulam M, Hoagland RE.  
628 Survey of the genomic landscape surrounding the 5-enolpyruvylshikimate-3-phosphate  
629 synthase (EPSPS) gene in glyphosate-resistant *Amaranthus palmeri* from  
630 geographically distant populations in the USA. Pest Manag Sci. 2018;74(5):1109-17.  
631 Epub 2017/07/08. doi: 10.1002/ps.4659. PubMed PMID: 28686355.
- 632 41. Molin WT, Patterson EL, Saski CA. Homogeneity among glyphosate-resistant  
633 *Amaranthus palmeri* in geographically distant locations. PLoS One.  
634 2020;15(9):e0233813. Epub 2020/09/10. doi: 10.1371/journal.pone.0233813. PubMed  
635 PMID: 32903277; PubMed Central PMCID: PMCPMC7480871.

- 636 42. Mehta D, Cornet L, Hirsch-Hoffmann M, Zaidi SS, Vanderschuren H. Full-length  
637 sequencing of circular DNA viruses and extrachromosomal circular DNA using CIDER-  
638 Seq. *Nat Protoc.* 2020;15(5):1673-89. Epub 2020/04/05. doi: 10.1038/s41596-020-  
639 0301-0. PubMed PMID: 32246135.
- 640 43. Chang F, May CD, Hoggard T, Miller J, Fox CA, Weinreich M. High-resolution  
641 analysis of four efficient yeast replication origins reveals new insights into the ORC and  
642 putative MCM binding elements. *Nucleic Acids Res.* 2011;39(15):6523-35. Epub  
643 2011/05/12. doi: 10.1093/nar/gkr301. PubMed PMID: 21558171; PubMed Central  
644 PMCID: PMC3159467.
- 645 44. Montgomery JS, Giacomini D, Waithaka B, Lanz C, Murphy BP, Campe R, et al.  
646 Draft Genomes of *Amaranthus tuberculatus*, *Amaranthus hybridus*, and *Amaranthus*  
647 *palmeri*. *Genome Biol Evol.* 2020;12(11):1988-93. Epub 2020/08/25. doi:  
648 10.1093/gbe/evaa177. PubMed PMID: 32835372; PubMed Central PMCID:  
649 PMCPMC7643611.
- 650 45. Sailer C, Babst-Kostecka A, Fischer MC, Zoller S, Widmer A, Vollenweider P, et  
651 al. Transmembrane transport and stress response genes play an important role in  
652 adaptation of *Arabidopsis halleri* to metalliferous soils. *Sci Rep.* 2018;8(1):16085. Epub  
653 2018/11/02. doi: 10.1038/s41598-018-33938-2. PubMed PMID: 30382172; PubMed  
654 Central PMCID: PMC6208402.
- 655 46. Keller I, Rodrigues CM, Neuhaus HE, Pommerrenig B. Improved resource  
656 allocation and stabilization of yield under abiotic stress. *J Plant Physiol.*  
657 2021;257:153336. Epub 2020/12/29. doi: 10.1016/j.jplph.2020.153336. PubMed PMID:  
658 33360492.

- 659 47. Shabala S, Bose J, Fuglsang AT, Pottosin I. On a quest for stress tolerance  
660 genes: membrane transporters in sensing and adapting to hostile soils. *J Exp Bot.*  
661 2016;67(4):1015-31. Epub 2015/10/29. doi: 10.1093/jxb/erv465. PubMed PMID:  
662 26507891.
- 663 48. Zhu JK. Abiotic Stress Signaling and Responses in Plants. *Cell.*  
664 2016;167(2):313-24. Epub 2016/10/08. doi: 10.1016/j.cell.2016.08.029. PubMed PMID:  
665 27716505; PubMed Central PMCID: PMC5104190.
- 666 49. Raffaele S, Leger A, Roby D. Very long chain fatty acid and lipid signaling in the  
667 response of plants to pathogens. *Plant Signal Behav.* 2009;4(2):94-9. doi: DOI  
668 10.4161/psb.4.2.7580. PubMed PMID: WOS:000213940700004.
- 669 50. Lim GH, Singhal R, Kachroo A, Kachroo P. Fatty Acid- and Lipid-Mediated  
670 Signaling in Plant Defense. *Annu Rev Phytopathol.* 2017;55:505-36. Epub 2017/08/05.  
671 doi: 10.1146/annurev-phyto-080516-035406. PubMed PMID: 28777926.
- 672 51. Cao X, Wang S, Ge L, Zhang W, Huang J, Sun W. Extrachromosomal Circular  
673 DNA: Category, Biogenesis, Recognition, and Functions. *Front Vet Sci.* 2021;8:693641.  
674 Epub 2021/09/28. doi: 10.3389/fvets.2021.693641. PubMed PMID: 34568472; PubMed  
675 Central PMCID: PMC58813.
- 676 52. Sinclair DA, Guarente L. Extrachromosomal rDNA circles--a cause of aging in  
677 yeast. *Cell.* 1997;91(7):1033-42. Epub 1998/01/15. doi: 10.1016/s0092-8674(00)80493-  
678 6. PubMed PMID: 9428525.
- 679 53. Yannicari M, Gigon R, Larsen A. Cytochrome P450 Herbicide Metabolism as  
680 the Main Mechanism of Cross-Resistance to ACCase- and ALS-Inhibitors in *Lolium* spp.

- 681 Populations From Argentina: A Molecular Approach in Characterization and Detection.  
682 Front Plant Sci. 2020;11. doi: ARTN 600301  
683 10.3389/fpls.2020.600301. PubMed PMID: WOS:000593945200001.
- 684 54. Busi R, Vila-Aiub MM, Powles SB. Genetic control of a cytochrome P450  
685 metabolism-based herbicide resistance mechanism in *Lolium rigidum*. Heredity (Edinb).  
686 2011;106(5):817-24. Epub 2010/09/30. doi: 10.1038/hdy.2010.124. PubMed PMID:  
687 20877397; PubMed Central PMCID: PMC3186236.
- 688 55. Li Q, Fang Y, Li X, Zhang H, Liu M, Yang H, et al. Mechanism of the plant  
689 cytochrome P450 for herbicide resistance: a modelling study. J Enzyme Inhib Med  
690 Chem. 2013;28(6):1182-91. Epub 2012/10/13. doi: 10.3109/14756366.2012.719505.  
691 PubMed PMID: 23057845.
- 692 56. Dimaano NG, Iwakami S. Cytochrome P450-mediated herbicide metabolism in  
693 plants: current understanding and prospects. Pest Manag Sci. 2021;77(1):22-32. Epub  
694 2020/08/11. doi: 10.1002/ps.6040. PubMed PMID: 32776423.
- 695 57. Pandian BA, Sathishraj R, Djanaguiraman M, Prasad PVV, Jugulam M. Role of  
696 Cytochrome P450 Enzymes in Plant Stress Response. Antioxidants (Basel). 2020;9(5).  
697 Epub 2020/05/30. doi: 10.3390/antiox9050454. PubMed PMID: 32466087; PubMed  
698 Central PMCID: PMC7278705.
- 699 58. Ali MS, Baek KH. Protective Roles of Cytosolic and Plastidal Proteasomes on  
700 Abiotic Stress and Pathogen Invasion. Plants (Basel). 2020;9(7). Epub 2020/07/08. doi:  
701 10.3390/plants9070832. PubMed PMID: 32630761; PubMed Central PMCID:  
702 PMC7412383.

- 703 59. Torres MA, Dangl JL. Functions of the respiratory burst oxidase in biotic  
704 interactions, abiotic stress and development. *Curr Opin Plant Biol.* 2005;8(4):397-403.  
705 Epub 2005/06/09. doi: 10.1016/j.pbi.2005.05.014. PubMed PMID: 15939662.
- 706 60. Baek KH, Choi D. Roles of Plant Proteases in Pathogen Defense. *Plant*  
707 *Pathology J.* 2008;24(4):367-74. doi: Doi 10.5423/Ppj.2008.24.4.367. PubMed PMID:  
708 WOS:000261334900001.
- 709 61. Usman MG, Rafii MY, Martini MY, Yusuff OA, Ismail MR, Miah G. Molecular  
710 analysis of Hsp70 mechanisms in plants and their function in response to stress.  
711 *Biotechnol Genet Eng Rev.* 2017;33(1):26-39. Epub 2017/06/27. doi:  
712 10.1080/02648725.2017.1340546. PubMed PMID: 28649918.
- 713 62. Alderson TR, Kim JH, Markley JL. Dynamical Structures of Hsp70 and Hsp70-  
714 Hsp40 Complexes. *Structure.* 2016;24(7):1014-30. Epub 2016/06/28. doi:  
715 10.1016/j.str.2016.05.011. PubMed PMID: 27345933; PubMed Central PMCID:  
716 PMCPMC4938735.
- 717 63. Masand S, Yadav SK. Overexpression of MuHSP70 gene from *Macrotyloma*  
718 *uniflorum* confers multiple abiotic stress tolerance in transgenic *Arabidopsis thaliana*.  
719 *Mol Biol Rep.* 2016;43(2):53-64. Epub 2015/12/24. doi: 10.1007/s11033-015-3938-y.  
720 PubMed PMID: 26694324.
- 721 64. Padmanabhan M, Cournoyer P, Dinesh-Kumar SP. The leucine-rich repeat  
722 domain in plant innate immunity: a wealth of possibilities. *Cell Microbiol.*  
723 2009;11(2):191-8. Epub 2008/11/20. doi: 10.1111/j.1462-5822.2008.01260.x. PubMed  
724 PMID: 19016785; PubMed Central PMCID: PMCPMC2762402.

- 725 65. Molin WT, Wright AA, VanGessel MJ, McCloskey WB, Jugulam M, Hoagland RE.  
726 Survey of the genomic landscape surrounding the 5-enolpyruvylshikimate-3-phosphate  
727 synthase (EPSPS) gene in glyphosate-resistant *Amaranthus palmeri* from  
728 geographically distant populations in the USA. *Pest Management Science*.  
729 2018;74(5):1109-17. doi: 10.1002/ps.4659. PubMed PMID: WOS:000428524600013.
- 730 66. Li W, Godzik A. Cd-hit: a fast program for clustering and comparing large sets of  
731 protein or nucleotide sequences. *Bioinformatics*. 2006;22(13):1658-9. Epub 2006/05/30.  
732 doi: 10.1093/bioinformatics/btl158. PubMed PMID: 16731699.
- 733 67. Cantarel BL, Korf I, Robb SM, Parra G, Ross E, Moore B, et al. MAKER: an  
734 easy-to-use annotation pipeline designed for emerging model organism genomes.  
735 *Genome Res*. 2008;18(1):188-96. Epub 2007/11/21. doi: 10.1101/gr.6743907. PubMed  
736 PMID: 18025269; PubMed Central PMCID: PMCPMC2134774.
- 737 68. Li H. Minimap2: pairwise alignment for nucleotide sequences. *Bioinformatics*.  
738 2018;34(18):3094-100. Epub 2018/05/12. doi: 10.1093/bioinformatics/bty191. PubMed  
739 PMID: 29750242; PubMed Central PMCID: PMCPMC6137996.
- 740 69. Marcais G, Delcher AL, Phillippy AM, Coston R, Salzberg SL, Zimin A.  
741 MUMmer4: A fast and versatile genome alignment system. *PLoS Comput Biol*.  
742 2018;14(1):e1005944. Epub 2018/01/27. doi: 10.1371/journal.pcbi.1005944. PubMed  
743 PMID: 29373581; PubMed Central PMCID: PMCPMC5802927.
- 744 70. Chan PP, Lowe TM. tRNAscan-SE: Searching for tRNA Genes in Genomic  
745 Sequences. *Methods Mol Biol*. 2019;1962:1-14. Epub 2019/04/26. doi: 10.1007/978-1-  
746 4939-9173-0\_1. PubMed PMID: 31020551; PubMed Central PMCID:  
747 PMCPMC6768409.

748 71. Quinlan AR. BEDTools: The Swiss-Army Tool for Genome Feature Analysis.  
749 Curr Protoc Bioinformatics. 2014;47:11 2 1-34. Epub 2014/09/10. doi:  
750 10.1002/0471250953.bi1112s47. PubMed PMID: 25199790; PubMed Central PMCID:  
751 PMCPMC4213956.

752

## 753 **Supporting information**

754 **S1 Table.** Summary and functional annotation of glyphosate sensitive eccDNAs.

755 **S2 Table.** Summary and functional annotation of glyphosate resistant eccDNAs.

756 **S3 Table.** Venn diagram result summary for glyphosate sensitive eccDNA samples with  
757 annotations.

758 **S4 Table.** Venn diagram result summary for glyphosate resistant eccDNA samples with  
759 annotations.

760 **S5 Table.** Gene ontology enrichment of all glyphosate sensitive eccDNA genes  
761 classified as biological **process (BP)**, **cellular component (CC)**, and **molecular**  
762 **function (MF)**.

763 **S6 Table.** Gene ontology enrichment of all glyphosate resistant eccDNA genes  
764 classified as biological process (BP), cellular component (CC), and molecular function  
765 (MF).

766 **S7 Table.** Repeat characterization of eccDNA in glyphosate sensitive and resistant  
767 samples.

768 **S8 Table.** Summary and functional annotation of predicted eccDNAs in glyphosate

769 sensitive and resistant biotypes from different states.

770 **S9 Table.** eccDNA with predicted EACs or ACS sequence.

771 **S10 Table.** Counts of eccDNA mapping to the *A. palmeri* genome.

772

773

774



Fig 1



Fig 2



a.



b.



c.



Fig 4

a.



b.



c.



Fig 5



Fig 6



Fig 7



Fig 8



Fig 9
